# Supplementary material for: Cognitive tests predict real-world errors: the relationship between drug name confusion rates in laboratory-based memory and perception tests and corresponding error rates in large pharmacy chains
Source: PubMed Central journal article supplement — BMJ Qual Saf. 2016 May 18;26(5):395–407. doi: 10.1136/bmjqs-2015-005099 (PMC5530327; doi:10.1136/bmjqs-2015-005099), 2016-05-18
Supplement: bmjqs-2015-005099supp001.pdf [file bmjqs-2015-005099supp001.pdf]

Running Head: MEMORY AND PERCEPTION TESTS PREDICT DRUG ERRORS

Online Appendix

*Drug name stimuli and data*

| <b>Prescribed Drug</b>                   | <b>Dispensed Drug</b>                  | <b>Transformed Real-World Error Rate</b> | <b>Backward Masking Error Rate</b> | <b>Progressive Demasking Error Rate</b> | <b>Speech-in-Noise Error Rate</b> | <b>Short-Term Memory Error Rate</b> | <b>Target/Prescribed Name Familiarity Ratings</b> |
|------------------------------------------|----------------------------------------|------------------------------------------|------------------------------------|-----------------------------------------|-----------------------------------|-------------------------------------|---------------------------------------------------|
| Alprazolam                               | Lorazepam                              | 5.0                                      | 5.0                                | 0.0                                     | 22.5                              | 7.7                                 | 5                                                 |
| Amlodipine Besylate/Olmesartan Medoxomil | Amlodipine Besylate/Benazepril HCL     | 42.8                                     | 60.0                               | 30.0                                    | 32.5                              | 33.3                                | 3                                                 |
| Amlodipine                               | <i>Ambien</i>                          | 1.4                                      | 7.5                                | 0.0                                     | 37.5                              | 0.0                                 | 5                                                 |
| Amlodipine                               | Amitriptyline                          | 1.9                                      | 12.5                               | 0.0                                     | 57.5                              | 0.0                                 | 5                                                 |
| <i>Amoxil</i>                            | <i>Augmentin</i>                       | 2.3                                      | 20.0                               | 0.0                                     | 30.0                              | 2.6                                 | 3                                                 |
| <i>Augmentin</i>                         | <i>Amoxil</i>                          | 24.6                                     | 5.0                                | 0.0                                     | 52.5                              | 2.6                                 | 5                                                 |
| Bacitracin                               | Bactroban                              | 255.5                                    | 27.5                               | 2.5                                     | 10.0                              | 12.8                                | 5                                                 |
| Benazepril                               | Bisoprolol                             | 18.2                                     | 5.0                                | 0.0                                     | 7.5                               | 2.6                                 | 5                                                 |
| <i>Benicar</i>                           | Benazepril                             | 26.4                                     | 15.0                               | 0.0                                     | 30.0                              | 0.0                                 | 5                                                 |
| Buprenorphine HCL                        | Buprenorphine HCL/Naloxone HCL         | 211.1                                    | 20.0                               | 2.5                                     | 32.5                              | 7.7                                 | 3                                                 |
| Butalbital/Aspirin/Caffeine              | Butalbital/Acetaminophen/Caffeine      | 811.6                                    | 40.0                               | 12.5                                    | 42.5                              | 28.2                                | 5                                                 |
| <i>Cardura</i>                           | <i>Counadin</i>                        | 34.7                                     | 10.0                               | 0.0                                     | 22.5                              | 0.0                                 | 3                                                 |
| Cefdinir                                 | Cephalexin                             | 5.6                                      | 15.0                               | 0.0                                     | 20.0                              | 0.0                                 | 3                                                 |
| Cefprozil                                | Cefadroxil                             | 21.4                                     | 40.0                               | 0.0                                     | 37.5                              | 7.7                                 | 2                                                 |
| <i>Ceftin</i>                            | Cefdinir                               | 16.4                                     | 50.0                               | 0.0                                     | 40.0                              | 0.0                                 | 2                                                 |
| <i>Cefzil</i>                            | Cefdinir                               | 35.7                                     | 42.5                               | 0.0                                     | 7.5                               | 5.1                                 | 2                                                 |
| <i>Celexa</i>                            | <i>Celebrex</i>                        | 4.8                                      | 25.0                               | 2.5                                     | 20.0                              | 5.1                                 | 4                                                 |
| Chlorthalidone                           | Chlorothiazide                         | 36.2                                     | 32.5                               | 5.0                                     | 32.5                              | 10.3                                | 5                                                 |
| Cholecalciferol                          | Ergocalciferol                         | 469.0                                    | 20.0                               | 0.0                                     | 47.5                              | 0.0                                 | 5                                                 |
| <i>Cipro</i>                             | <i>Ciprodex</i>                        | 4.7                                      | 40.0                               | 0.0                                     | 17.5                              | 0.0                                 | 5                                                 |
| <i>Clarinex-D</i>                        | <i>Claritin-D</i>                      | 271.6                                    | 40.0                               | 2.5                                     | 42.5                              | 12.8                                | 5                                                 |
| Clindamycin Phosphate/Benzoyl Peroxide   | Erythromycin Base/Benzoyl Peroxide     | 36.3                                     | 27.5                               | 5.0                                     | 27.5                              | 2.6                                 | 4                                                 |
| Clomiphene                               | Clomipramine                           | 338.8                                    | 40.0                               | 10.0                                    | 42.5                              | 7.7                                 | 2                                                 |
| Clonazepam                               | Lorazepam                              | 8.8                                      | 22.5                               | 0.0                                     | 25.0                              | 5.1                                 | 5                                                 |
| Clonidine                                | <i>Klonopin</i>                        | 5.6                                      | 5.0                                | 0.0                                     | 55.0                              | 0.0                                 | 5                                                 |
| <i>Desyrel</i>                           | Desipramine                            | 2.1                                      | 15.0                               | 0.0                                     | 15.0                              | 2.6                                 | 1                                                 |
| <i>Desyrel</i>                           | <i>Seroquel</i>                        | 4.1                                      | 10.0                               | 0.0                                     | 2.5                               | 0.0                                 | 1                                                 |
| Dexmethylphenidate                       | Methylphenidate                        | 16.5                                     | 10.0                               | 2.5                                     | 50.0                              | 5.1                                 | 3                                                 |
| Dextroamphetamine                        | Dexmethylphenidate                     | 134.5                                    | 37.5                               | 10.0                                    | 27.5                              | 15.4                                | 4                                                 |
| Doxepin                                  | Donepezil                              | 25.0                                     | 22.5                               | 0.0                                     | 32.5                              | 0.0                                 | 3                                                 |
| Doxycycline                              | Doxepin                                | 10.0                                     | 15.0                               | 2.5                                     | 22.5                              | 2.6                                 | 5                                                 |
| Ergocalciferol                           | Cholecalciferol                        | 14.4                                     | 7.5                                | 2.5                                     | 55.0                              | 2.6                                 | 5                                                 |
| Erythromycin Base/Benzoyl Peroxide       | Clindamycin Phosphate/Benzoyl Peroxide | 171.8                                    | 25.0                               | 10.0                                    | 50.0                              | 7.7                                 | 4                                                 |
| Escitalopram                             | Citalopram                             | 13.9                                     | 15.0                               | 2.5                                     | 20.0                              | 10.3                                | 5                                                 |
| <i>Exforge HCT</i>                       | <i>Exforge</i>                         | 105.8                                    | 55.0                               | 0.0                                     | 15.0                              | 15.4                                | 1                                                 |
| Famotidine                               | Furosemide                             | 22.1                                     | 12.5                               | 0.0                                     | 40.0                              | 5.1                                 | 5                                                 |
| Felodipine                               | <i>Feldene</i>                         | 17.6                                     | 20.0                               | 0.0                                     | 47.5                              | 0.0                                 | 4                                                 |
| <i>Fioricet</i>                          | <i>Fiorinal</i>                        | 74.0                                     | 12.5                               | 0.0                                     | 12.5                              | 0.0                                 | 5                                                 |
| Flavoxate                                | Fluvoxamine                            | 1269.8                                   | 40.0                               | 0.0                                     | 45.0                              | 12.8                                | 1                                                 |
| Fluocinonide                             | Fluocinolone                           | 69.3                                     | 30.0                               | 5.0                                     | 22.5                              | 17.9                                | 2                                                 |
| Flurazepam                               | Temazepam                              | 193.0                                    | 7.5                                | 0.0                                     | 15.0                              | 5.1                                 | 2                                                 |
| Gabapentin                               | Gemfibrozil                            | 1.9                                      | 5.0                                | 0.0                                     | 32.5                              | 0.0                                 | 5                                                 |
| Glipizide                                | Glyburide                              | 539.5                                    | 22.5                               | 0.0                                     | 22.5                              | 10.3                                | 5                                                 |

## MEMORY AND PERCEPTION TESTS PREDICT DRUG ERRORS

| Prescribed Drug                        | Dispensed Drug         | Transformed Real-World Error Rate | Backward Masking Error Rate | Progressive Demasking Error Rate | Speech-in-Noise Error Rate | Short-Term Memory Error Rate | Target/Prescribed Name Familiarity Ratings |
|----------------------------------------|------------------------|-----------------------------------|-----------------------------|----------------------------------|----------------------------|------------------------------|--------------------------------------------|
| <i>Humalog Mix</i>                     | <i>Humalog</i>         | 102.1                             | 30.0                        | 0.0                              | 35.0                       | 5.1                          | 5                                          |
| Hydralazine                            | Hydroxyzine            | 176.1                             | 37.5                        | 5.0                              | 37.5                       | 10.3                         | 5                                          |
| Hydroxyzine HCL                        | Hydroxyzine Pamoate    | 17.1                              | 17.5                        | 2.5                              | 50.0                       | 0.0                          | 5                                          |
| Hydroxyzine                            | Hydralazine            | 154.2                             | 22.5                        | 0.0                              | 15.0                       | 5.1                          | 5                                          |
| Hydroxyzine                            | Hydrochlorothiazide    | 36.7                              | 20.0                        | 0.0                              | 17.5                       | 5.1                          | 5                                          |
| Isosorbide Dinitrate                   | Isosorbide Mononitrate | 101.1                             | 22.5                        | 12.5                             | 5.0                        | 12.8                         | 5                                          |
| <i>Keppra</i>                          | <i>Keflex</i>          | 28.1                              | 25.0                        | 2.5                              | 25.0                       | 2.6                          | 5                                          |
| <i>Lamictal</i>                        | <i>Lomotil</i>         | 4.5                               | 7.5                         | 0.0                              | 47.5                       | 2.6                          | 5                                          |
| <i>Lamisil</i>                         | <i>Lamictal</i>        | 109.9                             | 22.5                        | 0.0                              | 17.5                       | 2.6                          | 4                                          |
| Lamotrigine                            | Levothyroxine          | 10.1                              | 10.0                        | 0.0                              | 12.5                       | 5.1                          | 4                                          |
| Levalbuterol                           | Albuterol              | 36.2                              | 10.0                        | 0.0                              | 57.5                       | 2.6                          | 5                                          |
| Levofloxacin                           | Levetiracetam          | 8.8                               | 5.0                         | 0.0                              | 17.5                       | 0.0                          | 5                                          |
| <i>Lipitor</i>                         | Lisinopril             | 4.5                               | 5.0                         | 0.0                              | 10.0                       | 2.6                          | 5                                          |
| Lisinopril                             | <i>Lasix</i>           | 1.0                               | 7.5                         | 0.0                              | 15.0                       | 0.0                          | 5                                          |
| Loratadine                             | Lovastatin             | 4.7                               | 5.0                         | 0.0                              | 17.5                       | 2.6                          | 5                                          |
| Lorazepam                              | Alprazolam             | 21.1                              | 12.5                        | 0.0                              | 25.0                       | 7.7                          | 5                                          |
| Losartan Potassium/Hydrochlorothiazide | Losartan Potassium     | 9.7                               | 42.5                        | 5.0                              | 22.5                       | 10.3                         | 5                                          |
| <i>Lotrisone</i>                       | <i>Lotrimin</i>        | 15.9                              | 40.0                        | 0.0                              | 15.0                       | 7.7                          | 2                                          |
| Metolazone                             | Methimazole            | 52.1                              | 30.0                        | 0.0                              | 40.0                       | 2.6                          | 3                                          |
| Metoprolol Succinate                   | Metoprolol Tartrate    | 35.0                              | 15.0                        | 7.5                              | 15.0                       | 10.3                         | 5                                          |
| Metronidazole                          | Metformin              | 5.8                               | 17.5                        | 5.0                              | 12.5                       | 5.1                          | 5                                          |
| Naproxen                               | <i>Naprosyn</i>        | 28.1                              | 10.0                        | 0.0                              | 35.0                       | 5.1                          | 5                                          |
| <i>Navane</i>                          | <i>Norvasc</i>         | 441.9                             | 42.5                        | 0.0                              | 10.0                       | 5.1                          | 1                                          |
| <i>Nicazel</i>                         | <i>Nizorel</i>         | 1516.8                            | 40.0                        | 2.5                              | 32.5                       | 7.7                          | 1                                          |
| <i>Novolog Mix</i>                     | <i>Novolog</i>         | 279.0                             | 30.0                        | 2.5                              | 27.5                       | 7.7                          | 5                                          |
| <i>Novolog</i>                         | <i>Novolog Mix</i>     | 31.4                              | 22.5                        | 0.0                              | 30.0                       | 2.6                          | 5                                          |
| <i>Onglyza</i>                         | Olanzapine             | 65.0                              | 15.0                        | 0.0                              | 27.5                       | 2.6                          | 1                                          |
| Oxcarbazepine                          | Oxaprozin              | 15.6                              | 35.0                        | 0.0                              | 37.5                       | 2.6                          | 3                                          |
| <i>Pravachol</i>                       | Propranolol            | 11.5                              | 15.0                        | 0.0                              | 20.0                       | 5.1                          | 3                                          |
| Prednisolone                           | Prednisone             | 82.3                              | 80.0                        | 55.0                             | 55.0                       | 20.5                         | 5                                          |
| <i>Prilosec</i>                        | Prednisone             | 1.8                               | 12.5                        | 0.0                              | 32.5                       | 2.6                          | 5                                          |
| <i>Prilosec</i>                        | <i>Prozac</i>          | 4.8                               | 2.5                         | 0.0                              | 17.5                       | 5.1                          | 5                                          |
| Promethazine                           | Prochlorperazine       | 4.6                               | 7.5                         | 0.0                              | 32.5                       | 2.6                          | 5                                          |
| <i>Prosom</i>                          | Prazosin               | 335.8                             | 55.0                        | 5.0                              | 35.0                       | 2.6                          | 1                                          |
| <i>Protonix</i>                        | <i>Pravachol</i>       | 9.6                               | 22.5                        | 0.0                              | 30.0                       | 0.0                          | 5                                          |
| <i>Prozac</i>                          | <i>Prilosec</i>        | 8.0                               | 17.5                        | 0.0                              | 12.5                       | 7.7                          | 5                                          |
| <i>Prozac</i>                          | <i>Provera</i>         | 1.6                               | 20.0                        | 0.0                              | 10.0                       | 0.0                          | 5                                          |
| Pyridoxine                             | <i>Pyridium</i>        | 134.1                             | 32.5                        | 2.5                              | 17.5                       | 5.1                          | 3.5                                        |
| <i>Relafen</i>                         | <i>Robaxin</i>         | 37.2                              | 25.0                        | 0.0                              | 12.5                       | 2.6                          | 1                                          |
| <i>Remeron</i>                         | <i>Restoril</i>        | 12.7                              | 10.0                        | 0.0                              | 32.5                       | 0.0                          | 3                                          |
| <i>Restoril</i>                        | <i>Remeron</i>         | 6.5                               | 12.5                        | 0.0                              | 7.5                        | 0.0                          | 3                                          |
| Risperidone                            | Ropinirole             | 11.0                              | 10.0                        | 0.0                              | 15.0                       | 5.1                          | 5                                          |
| <i>Robaxin</i>                         | <i>Relafen</i>         | 20.6                              | 15.0                        | 0.0                              | 7.5                        | 2.6                          | 1                                          |
| Ropinirole                             | Risperidone            | 19.9                              | 22.5                        | 0.0                              | 27.5                       | 15.4                         | 3                                          |
| Sertraline                             | <i>Seroquel</i>        | 1.4                               | 12.5                        | 0.0                              | 7.5                        | 0.0                          | 5                                          |
| Sulfasalazine                          | Sulfadiazine           | 124.3                             | 42.5                        | 12.5                             | 12.5                       | 20.5                         | 3.5                                        |
| <i>Tenuate</i>                         | <i>Tenormin</i>        | 127.8                             | 50.0                        | 0.0                              | 25.0                       | 2.6                          | 1                                          |
| <i>Thorazine</i>                       | Thioridazine           | 139.6                             | 22.5                        | 2.5                              | 12.5                       | 0.0                          | 3                                          |

## MEMORY AND PERCEPTION TESTS PREDICT DRUG ERRORS

| Prescribed Drug            | Dispensed Drug   | Transformed Real-World Error Rate | Backward Masking Error Rate | Progressive Demasking Error Rate | Speech-in-Noise Error Rate | Short-Term Memory Error Rate | Target/Prescribed Name Familiarity Ratings |
|----------------------------|------------------|-----------------------------------|-----------------------------|----------------------------------|----------------------------|------------------------------|--------------------------------------------|
| <i>Tobradex</i>            | Tobramycin       | 77.2                              | 7.5                         | 0.0                              | 7.5                        | 0.0                          | 4                                          |
| Tobramycin                 | <i>Tobradex</i>  | 78.1                              | 15.0                        | 0.0                              | 12.5                       | 5.1                          | 5                                          |
| <i>Tofranil</i>            | Topiramate       | 43.0                              | 27.5                        | 0.0                              | 5.0                        | 0.0                          | 1                                          |
| <i>Topamax</i>             | <i>Toprol-XL</i> | 6.5                               | 10.0                        | 2.5                              | 22.5                       | 2.6                          | 4                                          |
| <i>Toprol-XL</i>           | <i>Topamax</i>   | 1.9                               | 12.5                        | 0.0                              | 55.0                       | 2.6                          | 5                                          |
| <i>Toradol</i>             | Tramadol         | 19.4                              | 42.5                        | 0.0                              | 30.0                       | 5.1                          | 5                                          |
| Torsemide                  | Furosemide       | 33.4                              | 10.0                        | 0.0                              | 55.0                       | 2.6                          | 4                                          |
| Tramadol HCL/Acetaminophen | Tramadol HCL     | 21.6                              | 35.0                        | 7.5                              | 17.5                       | 5.1                          | 5                                          |
| Tramadol                   | Trazodone        | 7.6                               | 5.0                         | 0.0                              | 10.0                       | 5.1                          | 5                                          |
| Trazodone                  | Tramadol         | 55.0                              | 30.0                        | 0.0                              | 40.0                       | 2.6                          | 5                                          |
| <i>Voltaren</i>            | <i>Ultram</i>    | 5.1                               | 2.5                         | 0.0                              | 27.5                       | 0.0                          | 3.5                                        |
| Zaleplon                   | Zolpidem         | 90.4                              | 45.0                        | 2.5                              | 30.0                       | 2.6                          | 2                                          |
| <i>Zantac</i>              | <i>Zyrtec</i>    | 7.2                               | 15.0                        | 0.0                              | 10.0                       | 7.7                          | 5                                          |
| <i>Zestril</i>             | <i>Flexeril</i>  | 1.0                               | 20.0                        | 0.0                              | 5.0                        | 5.1                          | 3                                          |
| Zolpidem                   | Zaleplon         | 1.4                               | 10.0                        | 2.5                              | 10.0                       | 7.7                          | 5                                          |
| <i>Zyrtec</i>              | <i>Zantac</i>    | 5.0                               | 5.0                         | 0.0                              | 22.5                       | 0.0                          | 5                                          |
| <b>AVERAGES</b>            |                  | <b>95.7</b>                       | <b>22.1</b>                 | <b>2.3</b>                       | <b>26.3</b>                | <b>5.2</b>                   | <b>3.9</b>                                 |

### Legend:

- Prescribed Drug: The name of the drug that was prescribed (i.e., the name of the target drug).
- Dispensed Drug: The name of the drug that was incorrectly dispensed (i.e., the name of the competitor drug).
- Transformed Real-World Error Rate: The rate of the error (i.e., the number of wrong prescriptions dispensed divided by the total number of prescriptions) multiplied by an undisclosed constant. Multiplication by the constant number set the lowest error rate to 1.0.

## MEMORY AND PERCEPTION TESTS PREDICT DRUG ERRORS

- **Backward Masking Error Rate:** The percentage of participants who responded incorrectly to the drug name pair in the two-alternative forced-choice part of the backward masking test.
- **Progressive Demasking Error Rate:** The percentage of participants who responded incorrectly to the drug name pair in the two-alternative forced-choice part of the progressive demasking test.
- **Speech-In-Noise Error Rate:** The percentage of participants who responded incorrectly to the drug name pair in the two-alternative forced-choice part of the speech-in-noise test.
- **Short-Term Memory Error Rate:** The percentage of participants who responded incorrectly to the drug name pair in the two-alternative forced-choice part of the short-term memory test.
- **Target/Prescribed Name Familiarity Ratings:** The median familiarity rating of the target/prescribed drug name on a 1-5 Likert scale, with a higher number indicating more familiarity.

### Notes:

- Brand names are displayed in italicized font, whereas generic names are displayed in standard font.
- HCT stands for Hydrochlorothiazide; HCL stands for Hydrochloride; XL stands for Extended Release; D stands for Decongestant.
